# Supplementary material for: The Influence of Synthesis Method on Characteristics of Buffer and Organic Solutions of Thermo- and pH-Responsive Poly(N-[3-(diethylamino)propyl]methacrylamide)s
Source: MDPI journal article supplement (doi:10.3390/polym14020282), 2022-01-11
Supplement: s1 [file s1]

# The Influence of Synthesis Method on Characteristics of Buffer and Organic Solutions of Thermo- and pH-Responsive Poly(N-[3-(diethylamino)propyl]methacrylamide)s

Maria Simonova <sup>1,\*</sup>, Denis Kamorin <sup>2,3</sup>, Anton Sadikov <sup>2</sup>, Alexander Filippov <sup>1</sup>, and Oleg Kazantsev <sup>2</sup>

<sup>1</sup> Institute of Macromolecular Compounds of the Russian Academy of Sciences, Bolshoy Prospekt 31, 199004 Saint Petersburg, Russia; [afil@imc.macro.ru](mailto:afil@imc.macro.ru)

<sup>2</sup> Laboratory of Acrylic Monomers and Polymers, Department of Chemical Technology, Dzerzhinsk, Polytechnic Institute, Nizhny Novgorod State Technical University n.a. R.E. Alekseev, 24 Minin Street, 603950 Nizhny Novgorod, Russia; [d.kamorin@mail.ru](mailto:d.kamorin@mail.ru) (D.K.); [mr.sadikovanton@mail.ru](mailto:mr.sadikovanton@mail.ru) (A.S.); [kazantsev@dpingtu.ru](mailto:kazantsev@dpingtu.ru) (O.K.)

<sup>3</sup> Chromatography Laboratory, Department of Production Control and Chromatography Methods, Lobachevsky State University of Nizhni Novgorod, Dzerzhinsk Branch, 23 Prospekt Gagarina, 603950 Nizhny Novgorod, Russia

\* Correspondence: [mariasimonova1983@mail.ru](mailto:mariasimonova1983@mail.ru); Tel.: +7-81-2328-4102

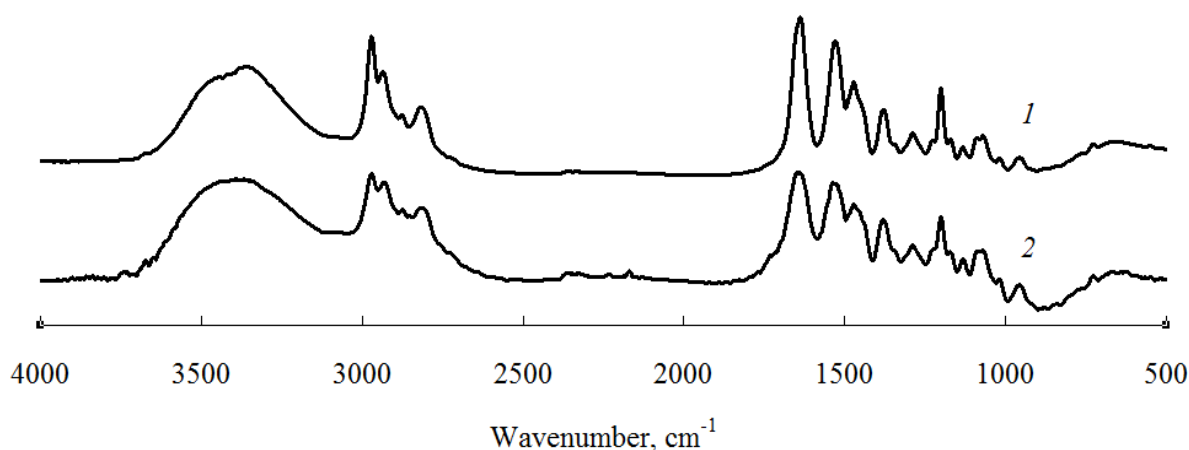

**Figure S1.** IR spectra of the PDEAPMA-C (1) and PDEAPMA-R (2).

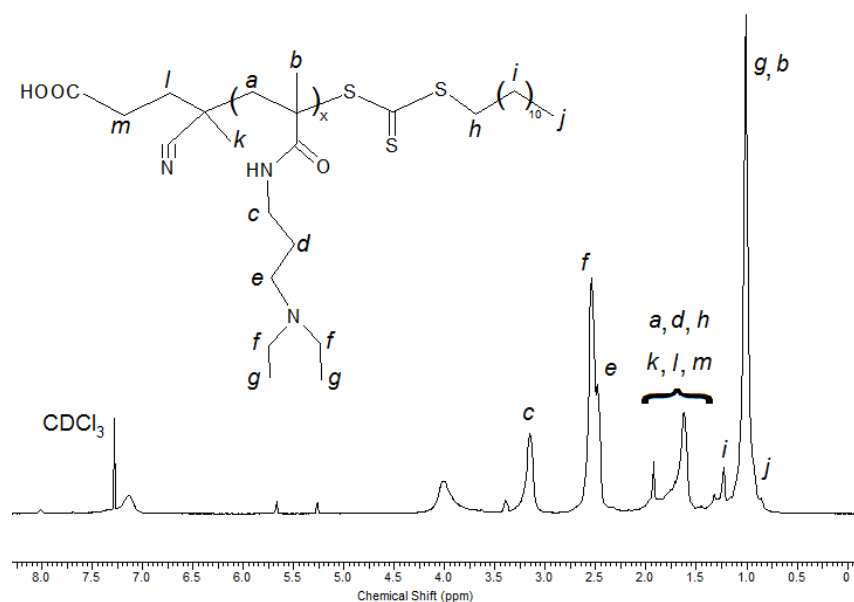

**Figure S2.**  $^1\text{H}$  NMR spectrum of the PDEAPMA-R.

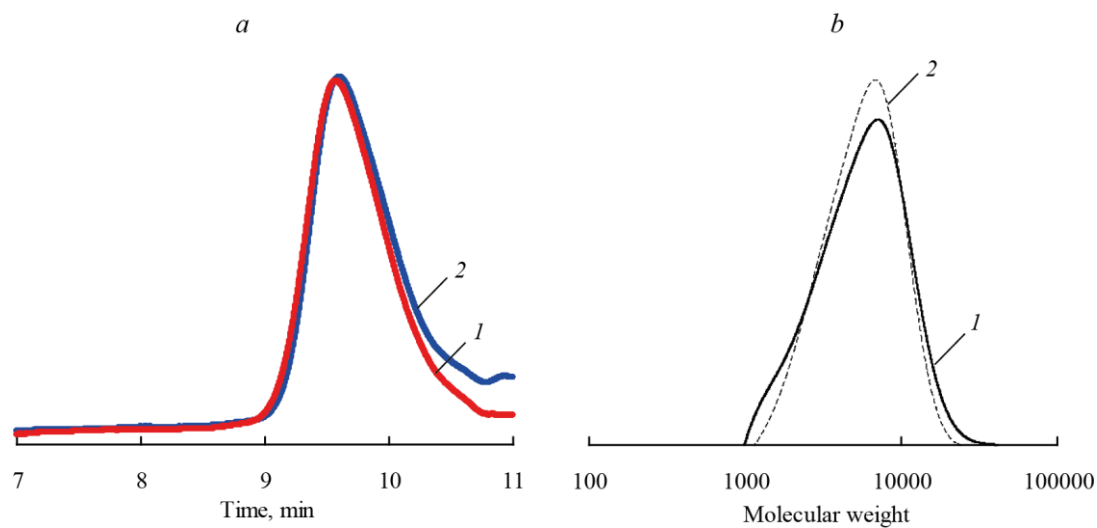

**Figure S3.** Figure S3: SEC traces (a) and molecular weight distribution (b) for the PDEAPMA-C (1) and PDEAPMA-R (2).
